# Supplementary material for: Cross-seeding enables repurposing of aurein antimicrobial peptides as a promoter of human islet amyloid polypeptide (hIAPP)
Source: Royal Society of Chemistry journal article supplement (doi:10.1039/d3tb01099f), 2023-01-01
Supplement: d3tb01099f1.pdf [file d3tb01099f1.pdf]

## SUPPORTING INFORMATION

### **Cross-Seeding Enables Repurposing of Aurein Antimicrobial Peptide as a Promoter of Human Islet Amyloid Polypeptide (hIAPP)**

Yijing Tang<sup>1</sup>, Dong Zhang<sup>1</sup>, Xiong Gong<sup>2</sup>, and Jie Zheng<sup>1\*</sup>

<sup>1</sup>Department of Chemical, Biomolecular, and Corrosion Engineering  
The University of Akron, Ohio, USA

<sup>2</sup>School of Polymer Science and Polymer Engineering  
The University of Akron, Ohio, USA

\* Corresponding author: [zhengj@uakron.edu](mailto:zhengj@uakron.edu)

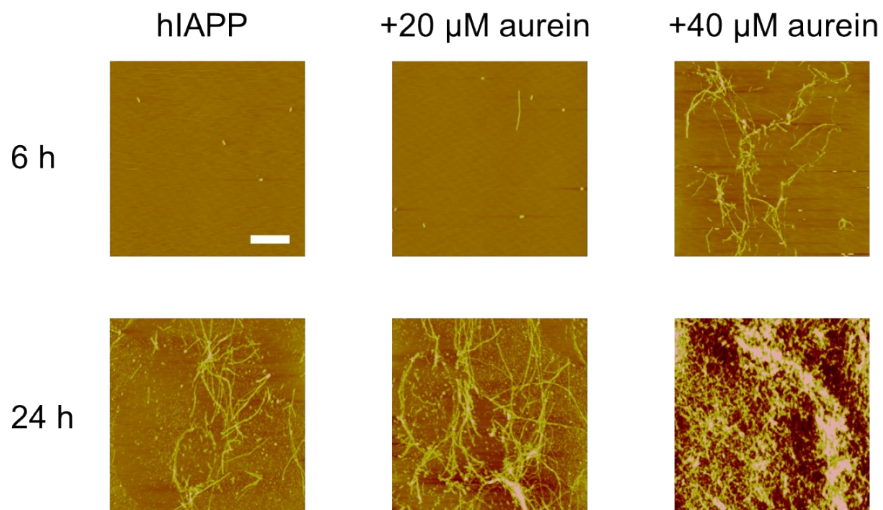

**Figure S1. Cross-seeding of aurein with hIAPP to accelerate fibril formation.** AFM images for pure hIAPP peptides (20 μM) in the absence and presence of different concentrations of aurein (20 μM and 40 μM) at 6 and 24 h. Scale bars are 1 μm.

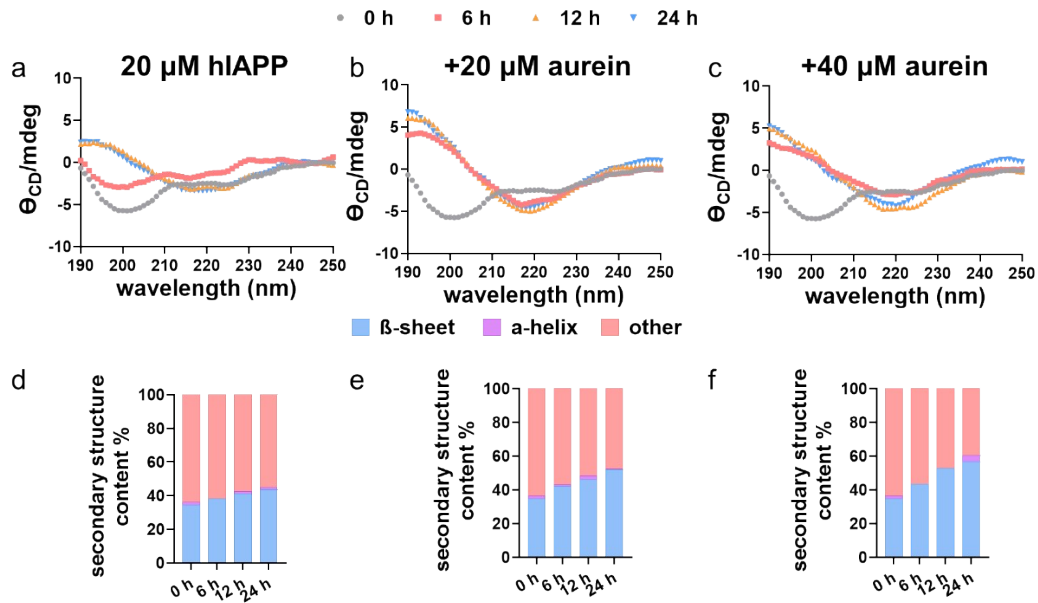

**Figure S2. Cross-seeding of aurein with hIAPP to promote secondary structure transitions.** (a-c) CD spectra and (d-f) the corresponding secondary structure contents for a 20  $\mu$ M hIAPP in the (a, d) absence and presence of (b, e) 20  $\mu$ M and (c, f) 40  $\mu$ M of aurein during 24 h of incubation.

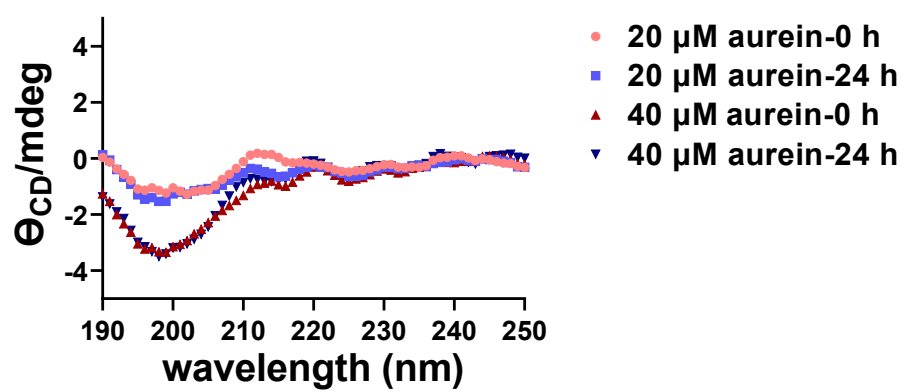

**Figure S3.** Time-dependent CD of aurein (20-40  $\mu M$ ) incubated at 37  $^{\circ}C$  for 0 and 24 h.

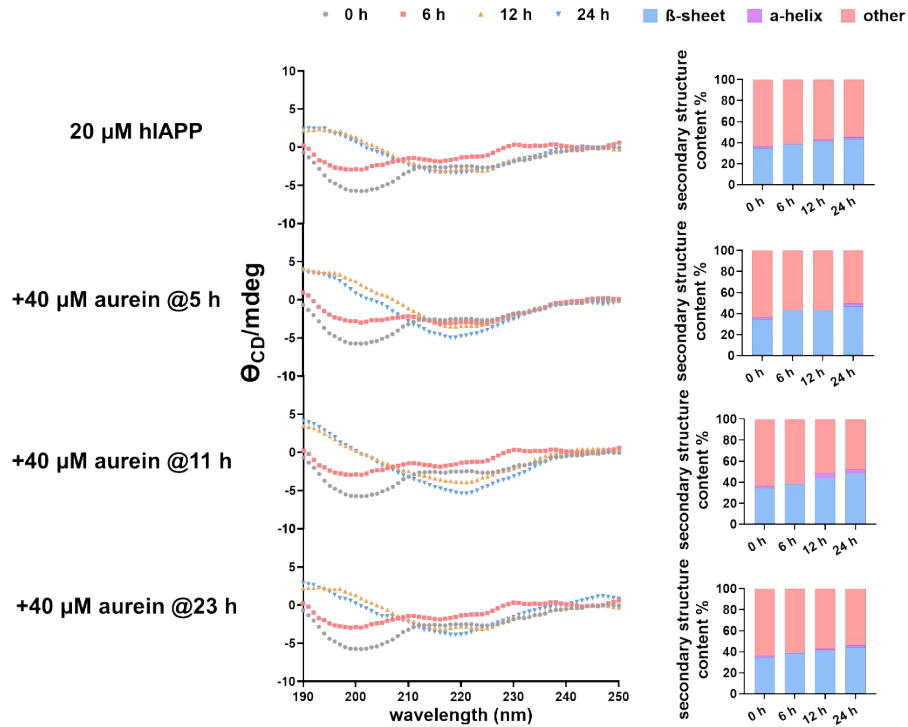

**Figure S4. Cross-seeding of aurein with different hIAPP seeds to redirect amyloid formation pathways.** Time-dependent CD spectra and corresponding secondary structure content for the cross-seeding of aurein (40  $\mu\text{M}$ ) with hIAPP (20  $\mu\text{M}$ ) seeds at different time points of 0, 5, 11, and 23 h.

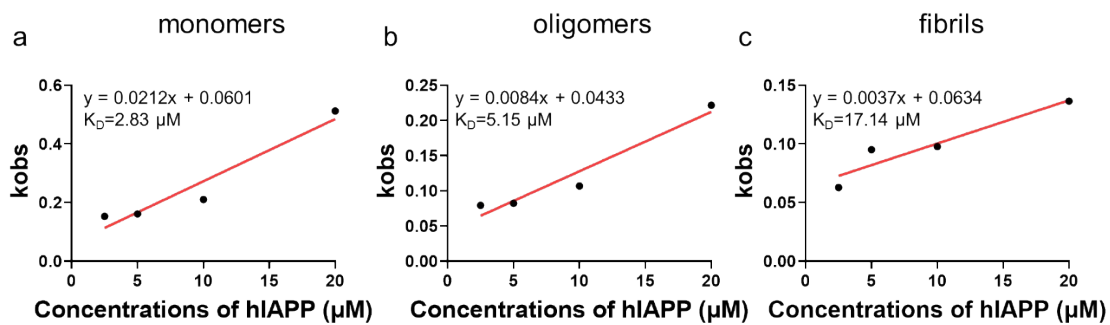

**Figure S5.** Binding constant ( $K_D$ ) of aurein with different hIAPP seeds of (a) monomers, (b) oligomers, and (c) fibrils calculated from SPR sensorgrams (**Fig. 3b**) by fitting observable binding constant  $k_{obs}$  to amyloid concentrations.

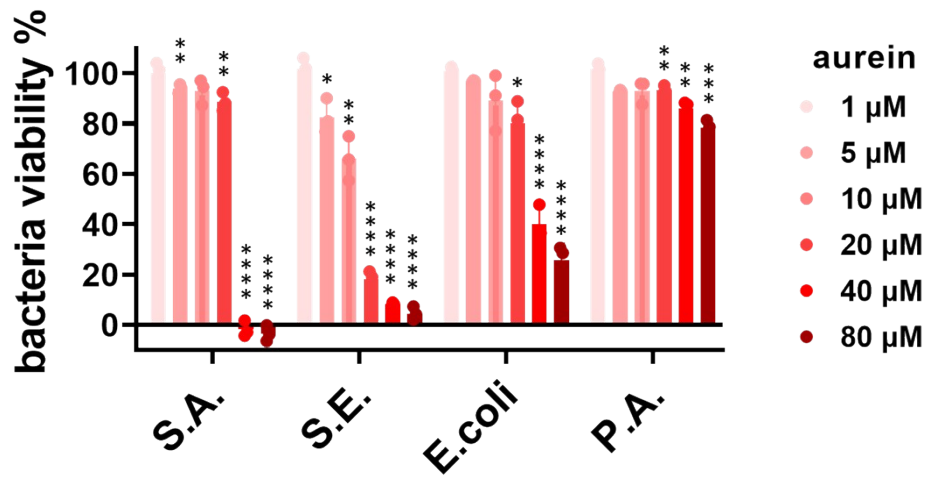

**Figure S6.** Dose-dependent anti-bacteria capacity of pure aurein (1-80 μM) against Gram-positive *S. A.* and (d) *S. E.* and Gram-negative *E. Coli* and (b) *P. A.* quantified by final bacterial density. All the Aurein-treated bacteria were normalized by untreated cells (positive control, 100% bacteria viability). All data represent mean ± s.d. of three independent experiments. Statistical analysis (n = 3) was performed for bacteria treated with aurein compared to untreated bacteria (i.e., bacterial viability=100%) (\*, p < 0.05; \*\*, p < 0.01; \*\*\*, p < 0.005; \*\*\*\*, p < 0.001).

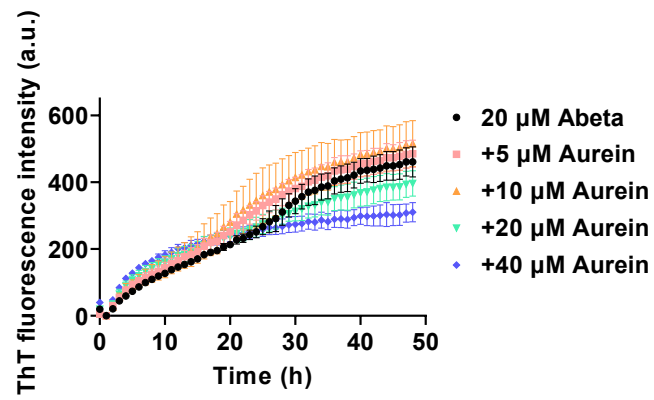

**Figure S7.** Dose-dependent promotion effect of aurein (10-40  $\mu\text{M}$ ) on A $\beta$  (20  $\mu\text{M}$ ) aggregation by ThT fluorescence assays. Data represent mean  $\pm$  standard error of triplicate measurements. (n=3).



## Reference

- (1) Chatterjee, S.; Khunti, K.; Davies, M. J. J. T. 1. Type 2 diabetes. **2017**, *389* (10085), 2239.
- (2) DeFronzo, R. A.; Ferrannini, E.; Groop, L.; Henry, R. R.; Herman, W. H.; Holst, J. J.; Hu, F. B.; Kahn, C. R.; Raz, I.; Shulman, G. I. J. N. r. D. p. Type 2 diabetes mellitus. **2015**, *1* (1), 1.
- (3) Vijan, S. J. A. o. i. m. Type 2 diabetes. **2010**, *152* (5), ITC3.
- (4) Wu, Y.; Ding, Y.; Tanaka, Y.; Zhang, W. J. I. j. o. m. s. Risk factors contributing to type 2 diabetes and recent advances in the treatment and prevention. **2014**, *11* (11), 1185.
- (5) Blair, S. N. J. B. j. o. s. m. Physical inactivity: the biggest public health problem of the 21st century. **2009**, *43* (1), 1.
- (6) Horta, B. L.; Loret de Mola, C.; Victora, C. G. J. A. p. Long-term consequences of breastfeeding on cholesterol, obesity, systolic blood pressure and type 2 diabetes: a systematic review and meta-analysis. **2015**, *104*, 30.
- (7) Hillier, T. A.; Pedula, K. L. J. D. c. Characteristics of an adult population with newly diagnosed type 2 diabetes: the relation of obesity and age of onset. **2001**, *24* (9), 1522.
- (8) De Pergola, G.; Triggiani, V.; Bartolomeo, N.; Nardecchia, A.; Angelo Giagulli, V.; Bruno, I.; Caccavo, D.; Silvestris, F. J. E., Metabolic; Targets, I. D.-D. Independent relationship of osteocalcin circulating levels with obesity, type 2 diabetes, hypertension, and HDL cholesterol. **2016**, *16* (4), 270.
- (9) Jaikaran, E. T.; Clark, A. Islet amyloid and type 2 diabetes: from molecular misfolding to islet pathophysiology. *Biochimica et Biophysica Acta (BBA)-Molecular Basis of Disease* **2001**, *1537* (3), 179.
- (10) Saeedi, P.; Petersohn, I.; Salpea, P.; Malanda, B.; Karuranga, S.; Unwin, N.; Colagiuri, S.; Guariguata, L.; Motala, A. A.; Ogurtsova, K. Global and regional diabetes prevalence estimates for 2019 and projections for 2030 and 2045: Results from the International Diabetes Federation Diabetes Atlas. *Diabetes research and clinical practice* **2019**, *157*, 107843.
- (11) Zhang, M.; Hu, R.; Chen, H.; Chang, Y.; Gong, X.; Liu, F.; Zheng, J. Interfacial interaction and lateral association of cross-seeding assemblies between hIAPP and rIAPP oligomers. *Physical Chemistry Chemical Physics* **2015**, *17* (16), 10373.
- (12) Kapurniotu, A. Amyloidogenicity and cytotoxicity of islet amyloid polypeptide. *Peptide Science: Original Research on Biomolecules* **2001**, *60* (6), 438.
- (13) Selkoe, D. J. Folding proteins in fatal ways. *Nature* **2003**, *426* (6968), 900.
- (14) Lorenzo, A.; Razzaboni, B.; Weir, G. C.; Yankner, B. A. Pancreatic islet cell toxicity of amylin associated with type-2 diabetes mellitus. *Nature* **1994**, *368* (6473), 756.
- (15) Weyer, C.; Maggs, D. G.; Young, A. A.; Kolterman, O. G. J. C. p. d. Amylin replacement with pramlintide as an adjunct to insulin therapy in type 1 and type 2 diabetes mellitus: a physiological approach toward improved metabolic control. **2001**, *7* (14), 1353.

- (16) Guo, J.; Sun, W.; Li, L.; Liu, F.; Lu, W. Brazilin inhibits fibrillogenesis of human islet amyloid polypeptide, disassembles mature fibrils, and alleviates cytotoxicity. *RSC advances* **2017**, *7* (69), 43491.
- (17) Ren, B.; Liu, Y.; Zhang, Y.; Zhang, M.; Sun, Y.; Liang, G.; Xu, J.; Zheng, J. J. J. o. M. C. B. Tanshinones inhibit hIAPP aggregation, disaggregate preformed hIAPP fibrils, and protect cultured cells. **2018**, *6* (1), 56.
- (18) Zhang, Y.; Zhang, D.; Tang, Y.; Ren, B.; Liu, F.; Xu, L.; Chang, Y.; Zheng, J. J. M. A. Aromadendrin: a dual amyloid promoter to accelerate fibrillization and reduce cytotoxicity of both amyloid- $\beta$  and hIAPP. **2020**, *1* (5), 1241.
- (19) Sparks, S.; Liu, G.; Robbins, K. J.; Lazo, N. D. Curcumin modulates the self-assembly of the islet amyloid polypeptide by disassembling  $\alpha$ -helix. *Biochemical and biophysical research communications* **2012**, *422* (4), 551.
- (20) Franko, A.; Rodriguez Camargo, D. C.; Böddrich, A.; Garg, D.; Rodriguez Camargo, A.; Rathkolb, B.; Janik, D.; Aichler, M.; Feuchtinger, A.; Neff, F. J. S. r. Epigallocatechin gallate (EGCG) reduces the intensity of pancreatic amyloid fibrils in human islet amyloid polypeptide (hIAPP) transgenic mice. **2018**, *8* (1), 1116.
- (21) Mishra, R.; Sellin, D.; Radovan, D.; Gohlke, A.; Winter, R. J. C. Inhibiting islet amyloid polypeptide fibril formation by the red wine compound resveratrol. **2009**, *10* (3), 445.
- (22) Tang, Y.; Zhang, D.; Zhang, Y.; Liu, Y.; Gong, X.; Chang, Y.; Ren, B.; Zheng, J. J. A. A. B. M. Introduction and fundamentals of human islet amyloid polypeptide inhibitors. **2020**, *3* (12), 8286.
- (23) Kusminski, C. M.; McEternan, P. G.; Kumar, S. J. C. s. Role of resistin in obesity, insulin resistance and Type II diabetes. **2005**, *109* (3), 243.
- (24) Hudish, L. I.; Reusch, J. E.; Sussel, L. J. T. J. o. c. i.  $\beta$  Cell dysfunction during progression of metabolic syndrome to type 2 diabetes. **2019**, *129* (10), 4001.
- (25) Berbudi, A.; Rahmadika, N.; Tjahjadi, A. I.; Ruslami, R. J. C. d. r. Type 2 diabetes and its impact on the immune system. **2020**, *16* (5), 442.
- (26) Oguntibeju, O. O. J. I. j. o. p., pathophysiology; pharmacology. Type 2 diabetes mellitus, oxidative stress and inflammation: examining the links. **2019**, *11* (3), 45.
- (27) Gonzalez, L. L.; Garrie, K.; Turner, M. D. J. B. e. B. A.-M. B. o. D. Type 2 diabetes—an autoinflammatory disease driven by metabolic stress. **2018**, *1864* (11), 3805.
- (28) El Saghir, A.; Farrugia, G.; Vassallo, N. J. C.; Lipids, P. o. The human islet amyloid polypeptide in protein misfolding disorders: Mechanisms of aggregation and interaction with biomembranes. **2021**, *234*, 105010.
- (29) Dupuis, N. F.; Wu, C.; Shea, J.-E.; Bowers, M. T. J. J. o. t. A. C. S. The amyloid formation mechanism in human IAPP: dimers have  $\beta$ -strand monomer–monomer interfaces. **2011**, *133* (19), 7240.
- (30) Tang, Y.; Liu, Y.; Zhang, Y.; Zhang, D.; Gong, X.; Zheng, J. J. A. C. N. Repurposing a cardiovascular disease drug of cloridarol as hIAPP inhibitor. **2021**, *12* (8), 1419.

- (31) Yang, G.; Wei, J.; Liu, P.; Zhang, Q.; Tian, Y.; Hou, G.; Meng, L.; Xin, Y.; Jiang, X. J. M. Role of the gut microbiota in type 2 diabetes and related diseases. **2021**, *117*, 154712.
- (32) Albandar, J. M.; Rams, T. E. J. P. Global epidemiology of periodontal diseases: an overview. **2002**, *29* (1), 7.
- (33) D'aiuto, F.; Sabbah, W.; Netuveli, G.; Donos, N.; Hingorani, A. D.; Deanfield, J.; Tsakos, G. J. T. J. o. C. E.; Metabolism. Association of the metabolic syndrome with severe periodontitis in a large US population-based survey. **2008**, *93* (10), 3989.
- (34) Xie, K.; Xu, B.; Zhang, Y.; Chen, M.; Ji, Y.; Wang, J.; Huang, Z.; Zhou, K.; Xia, Y.; Tang, W. J. J. o. c. p. A multi-method evaluation of the effects of Inflammatory cytokines (IL-1 $\beta$ , IFN- $\gamma$ , TNF- $\alpha$ ) on pancreatic  $\beta$ -cells. **2018**, *233* (12), 9375.
- (35) Wachlin, G.; Augstein, P.; Schröder, D.; Kuttler, B.; Klötting, I.; Heinke, P.; Schmidt, S. J. J. o. a. IL-1 $\beta$ , IFN- $\gamma$  and TNF- $\alpha$  increase vulnerability of pancreatic beta cells to autoimmune destruction. **2003**, *20* (4), 303.
- (36) Demmer, R.; Jacobs Jr, D.; Singh, R.; Zuk, A.; Rosenbaum, M.; Papapanou, P.; Desvarieux, M. J. J. o. d. r. Periodontal bacteria and prediabetes prevalence in ORIGINS: the oral infections, glucose intolerance, and insulin resistance study. **2015**, *94* (9\_suppl), 201S.
- (37) Demmer, R. T.; Breskin, A.; Rosenbaum, M.; Zuk, A.; LeDuc, C.; Leibel, R.; Paster, B.; Desvarieux, M.; Jacobs Jr, D. R.; Papapanou, P. N. J. J. o. c. p. The subgingival microbiome, systemic inflammation and insulin resistance: the oral infections, glucose intolerance and insulin resistance study. **2017**, *44* (3), 255.
- (38) Hjelmessaeth, J.; Asberg, A.; Muller, F.; Hartmann, A.; Jenssen, T. J. C. d. r. New-onset posttransplantation diabetes mellitus: insulin resistance or insulinopenia? Impact of immunosuppressive drugs, cytomegalovirus and hepatitis C virus infection. **2005**, *1* (1), 1.
- (39) Hjelmessaeth, J.; Sagedal, S.; Hartmann, A.; Rollag, H.; Egeland, T.; Hagen, M.; Nordal, K.; Jenssen, T. J. D. Asymptomatic cytomegalovirus infection is associated with increased risk of new-onset diabetes mellitus and impaired insulin release after renal transplantation. **2004**, *47*, 1550.
- (40) Westwell-Roper, C.; Dai, D. L.; Soukhatcheva, G.; Potter, K. J.; van Rooijen, N.; Ehses, J. A.; Verchere, C. B. J. T. j. o. i. IL-1 blockade attenuates islet amyloid polypeptide-induced proinflammatory cytokine release and pancreatic islet graft dysfunction. **2011**, *187* (5), 2755.
- (41) Masters, S. L.; Dunne, A.; Subramanian, S. L.; Hull, R. L.; Tannahill, G. M.; Sharp, F. A.; Becker, C.; Franchi, L.; Yoshihara, E.; Chen, Z. J. N. i. Activation of the NLRP3 inflammasome by islet amyloid polypeptide provides a mechanism for enhanced IL-1 $\beta$  in type 2 diabetes. **2010**, *11* (10), 897.
- (42) Farrim, M. I. d. J. D., 2021.
- (43) Wang, C.; Ma, Y.-H.; Han, X.; Lu, X. J. L. Re-Examining Interaction between Antimicrobial Peptide Aurein and Model Cell Membranes via SFG. **2022**.

- (44) Fernandez, D. I.; Le Brun, A. P.; Whitwell, T. C.; Sani, M.-A.; James, M.; Separovic, F. J. P. C. C. P. The antimicrobial peptide Aurein disrupts model membranes via the carpet mechanism. **2012**, *14* (45), 15739.
- (45) Wang, L.; Liu, Q.; Chen, J.-C.; Cui, Y.-X.; Zhou, B.; Chen, Y.-X.; Zhao, Y.-F.; Li, Y.-M. J. B. c. Antimicrobial activity of human islet amyloid polypeptides: an insight into amyloid peptides' connection with antimicrobial peptides. **2012**, *393* (7), 641.
- (46) Micsonai, A.; Wien, F.; Kernya, L.; Lee, Y.-H.; Goto, Y.; Réfrégiers, M.; Kardos, J. Accurate secondary structure prediction and fold recognition for circular dichroism spectroscopy. *Proceedings of the National Academy of Sciences* **2015**, *112* (24), E3095.
- (47) Li, Z.; Narouz, M. R.; Munro, K.; Hao, B.; Crudden, C. M.; Horton, J. H.; Hao, H. Carboxymethylated dextran-modified n-heterocyclic carbene self-assembled monolayers on gold for use in surface plasmon resonance biosensing. *ACS applied materials & interfaces* **2017**, *9* (45), 39223.
